# Supplementary material for: Preventive effect of pectic oligosaccharides on acute colitis model mice: modulating epithelial barrier, gut microbiota and Treg/Th17 balance
Source: Royal Society of Chemistry journal article supplement (doi:10.1039/d2fo01448c), 2022-01-01
Supplement: d2fo01448c1.pdf [file d2fo01448c1.pdf]

A

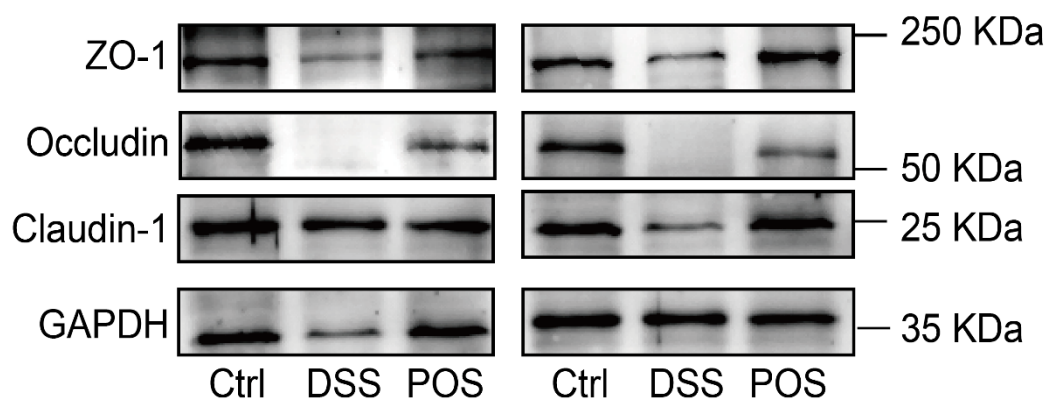

**Figure S1. Supplementary images for Western Blot.**

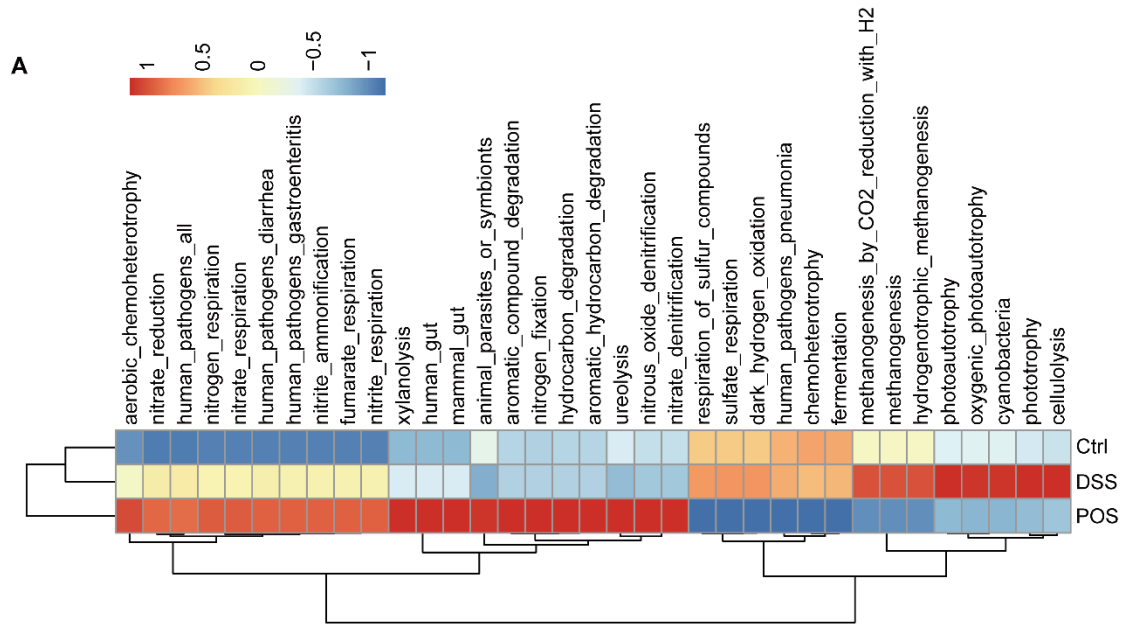

**Figure S2. Functional analysis of the microbiota.**

**Table S1. Food intake for each group.**

|       | <b>Ctrl</b>   | <b>DSS</b>    | <b>POS</b>    |
|-------|---------------|---------------|---------------|
| Day 1 | 15.36 g (n=6) | 15.84 g (n=6) | 14.77 g (n=6) |
| Day 2 | 15.76 g (n=6) | 16.75 g (n=6) | 13.56 g (n=6) |
| Day 3 | 16.04 g (n=6) | 15.52 g (n=6) | 12.32 g (n=6) |
| Day 4 | 13.56 g (n=6) | 9.74 g (n=6)  | 10.01 g (n=6) |
| Day 5 | 15.68 g (n=6) | 7.48 g (n=6)  | 6.79 g (n=6)  |
| Day 6 | 14.37 g (n=6) | 3.18 g (n=5)  | 7.00 g (n=6)  |
| Day 7 | 15.20 g (n=6) | 2.00 g (n=4)  | 3.10 g (n=5)  |

**Table S2. The primers sequences used for PCR reaction.**

| <b>Gene name</b> | <b>Primers sequence</b>                                     |
|------------------|-------------------------------------------------------------|
| GAPDH            | F: GGTTGTCTCCTGCGACTTCA<br>R: TGGTCCAGGGTTTCTTACTCC         |
| IL-17A           | F: GTTAGGGTGCTTTAGGTCC<br>R: TAACAATGAGTTTCTGTACG           |
| IL-10            | F: GGTTGTTCGTCTCATTCTGAAAGA<br>R: GGTAGAGGACCCAAGTTCGTTAAGA |
| IL-6             | F: CTTCTTGGGACTGATGCTGGTGAC<br>R: AGGTCTGTTGGGAGTGGTATCCTC  |
| TNF- $\alpha$    | F: ATGTCTCAGCCTCTTCTCATTC<br>R: GCTTGTCACTCGAATTTTGAGA      |
| IL-1 $\beta$     | F: TCGCAGCAGCACATCAACAAGAG<br>R: AGGTCCACGGGAAAGACACAGG     |
| IFN- $\gamma$    | F: CTTGAAAGACAATCAGGCCATC<br>R: CTTGGCAATACTCATGAATGCA      |
| ZO-1             | F: CTGGTGAAGTCTCGGAAAAATG<br>R: CATCTCTTGCTGCCAAACTATC      |
| Occludin         | F: TGCTTCATCGCTTCCTTAGTAA<br>R: GGGTTCACTCCCATTATGTACA      |
| Claudin-1        | F: AGATACAGTGCAAAGTCTTCGA<br>R: CAGGATGCCAATTACCATCAAG      |

F: Forward; R: Reverse
